# Supplementary material
Source: bioRxiv or medRxiv preprint supplement (https://www.biorxiv.org/highwire/filestream/43848/field_highwire_adjunct_files/0/147686-1.pdf)
Supplement: Supplementary file [file 147686-1.pdf]

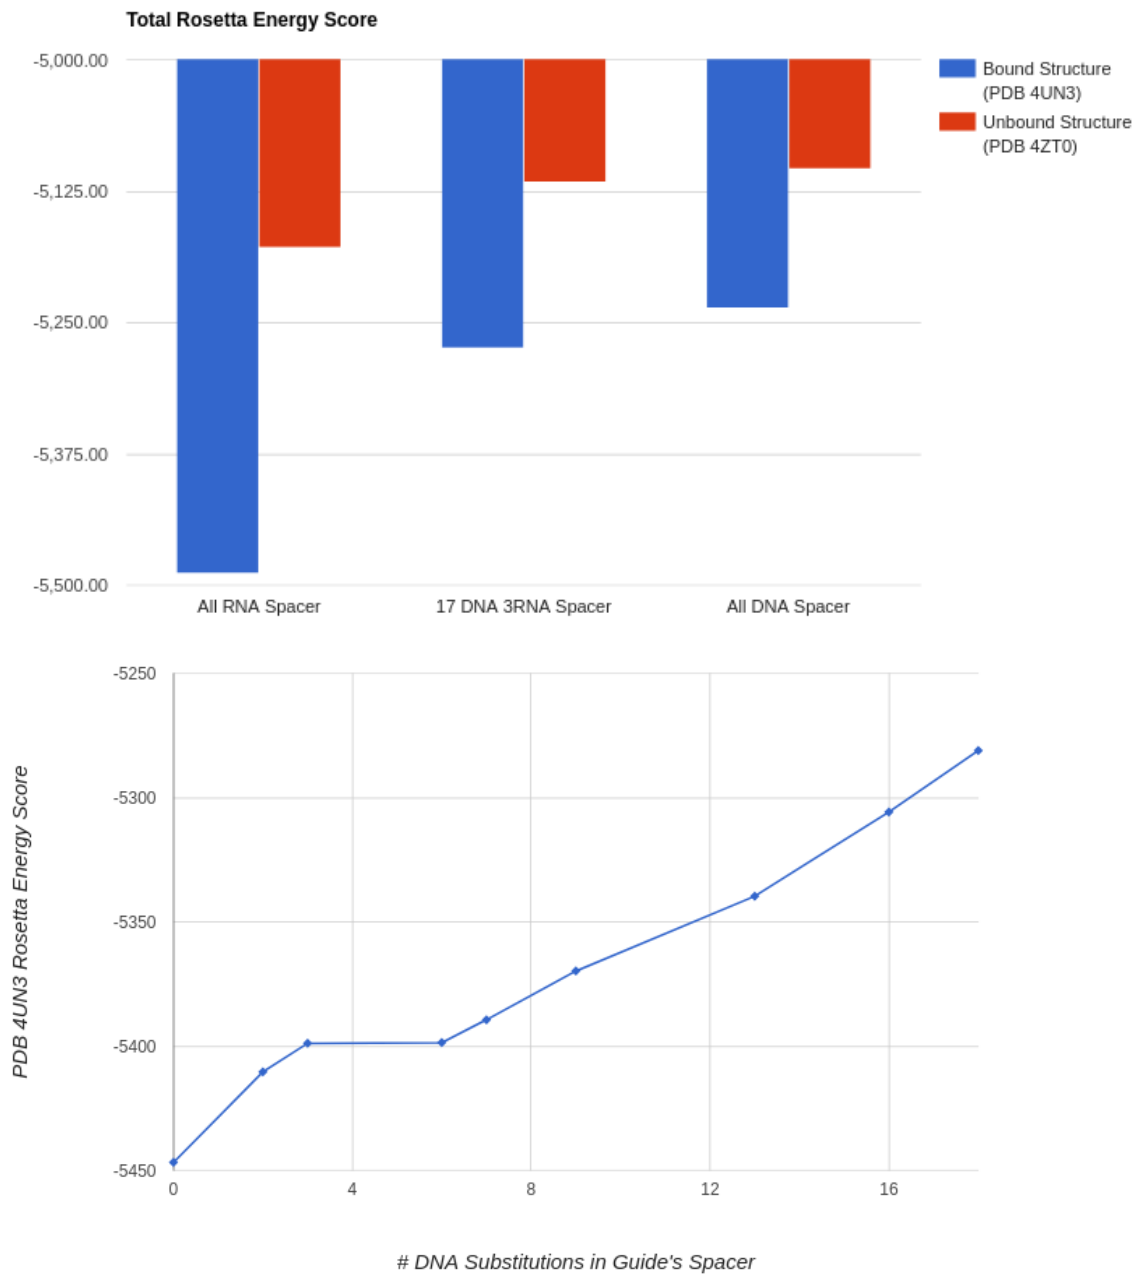

Figure 1 Supplement 1



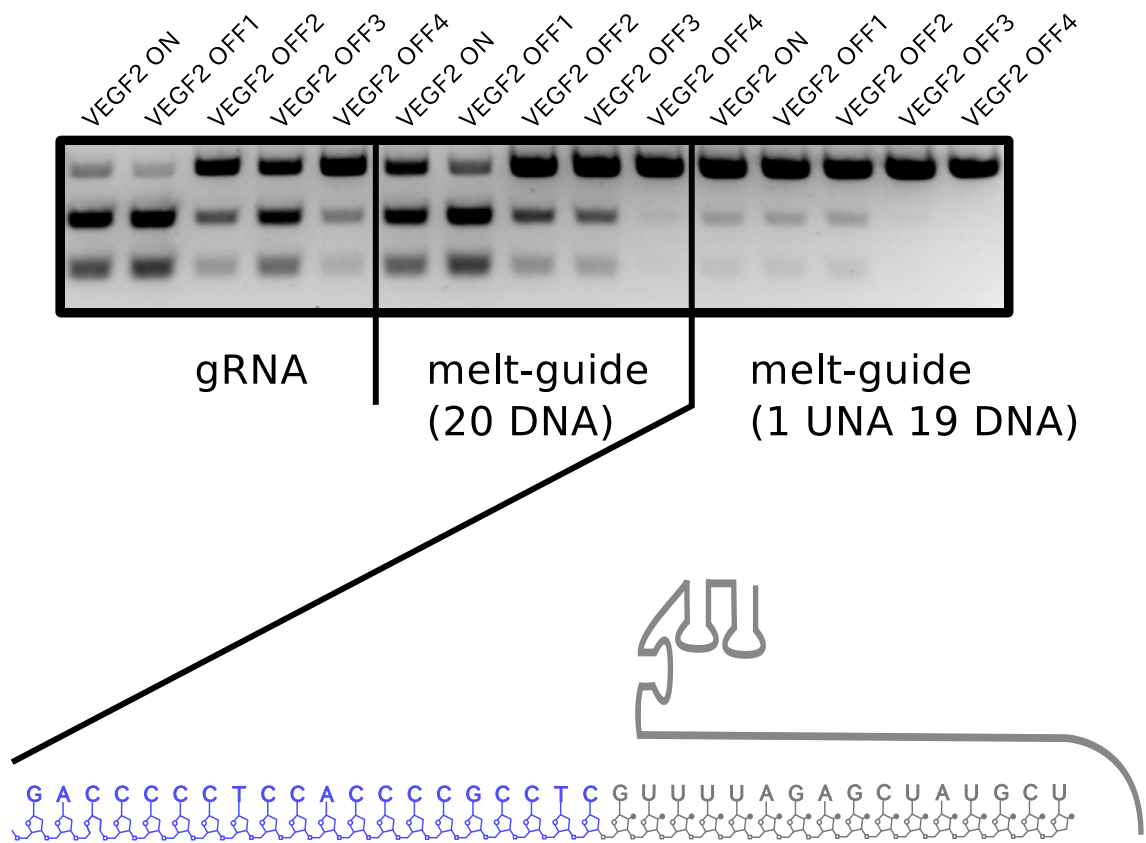

Figure 1 Supplement 3

Cleavage products in boxes are proportional to indel percentages.

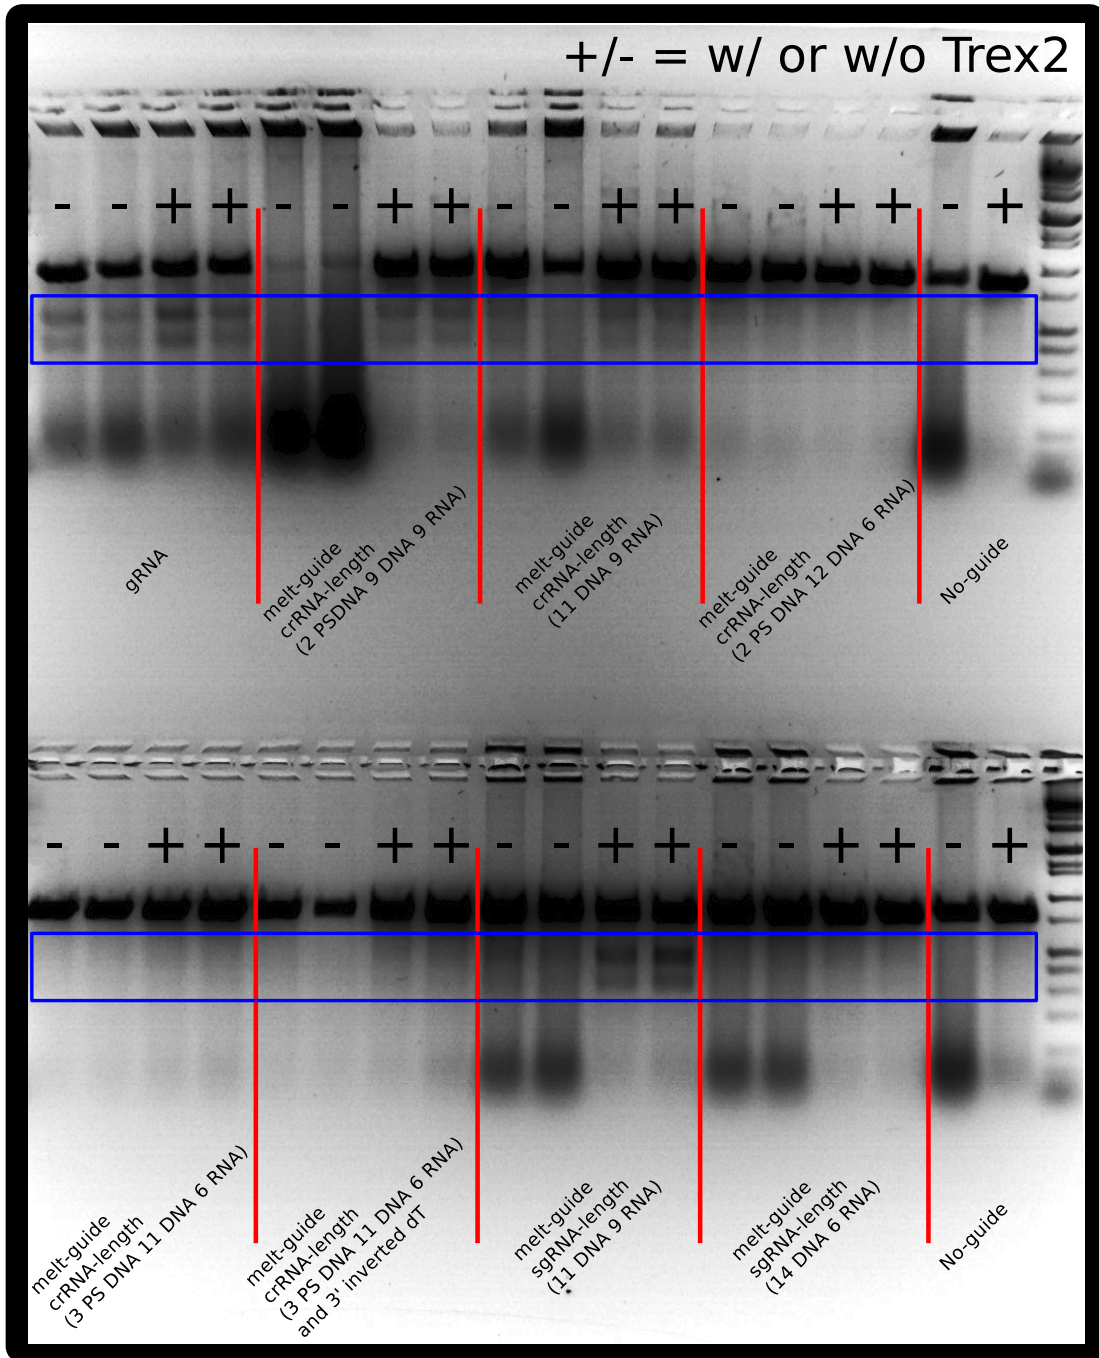

Figure 2 Supplement 1

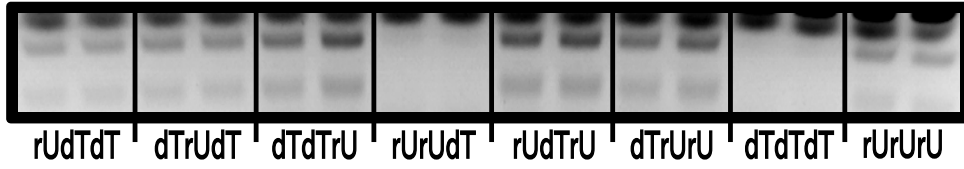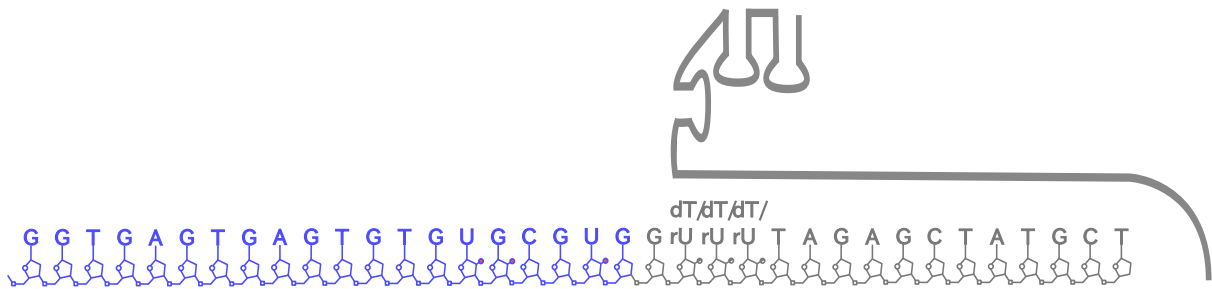

Figure 2 Supplement 2
